# Supplementary material for: Study on the prognosis predictive model of COVID-19 patients based on CT radiomics
Source: PubMed Central journal article supplement (PMC8172890; doi:10.1038/s41598-021-90991-0), 2021-06-02
Supplement: 41598_2021_90991_MOESM1_ESM.pdf [file 41598_2021_90991_MOESM1_ESM.pdf]

# **Study on the prognosis predictive model of COVID-19 patients based on CT radiomics**

Dandan Wang<sup>1</sup>, Chencui Huang<sup>2</sup>, Siyu Bao<sup>2</sup>, Tingting Fan<sup>1</sup>, Zhongqi Sun<sup>1</sup>, Yiqiao Wang<sup>1</sup>, Song Wang<sup>3</sup>, and Huijie Jiang<sup>1\*</sup>

<sup>1</sup>Department of Radiology, The Second Affiliated Hospital of Harbin Medical University, Harbin, China

<sup>2</sup>Department of Research Collaboration, R&D center, Beijing Deepwise & League of PHD Technology Co., Ltd, Beijing, China

<sup>3</sup> Department of Radiology, Longhua Hospital , Shanghai University of Traditional Chinese Medicine

## **\* corresponding author:**

Huijie Jiang, PhD, Department of Radiology, The Second Affiliated Hospital of Harbin Medical University, 246 Xuefu Road, Harbin, Heilongjiang Province, China.

E-mail: [jianghuijie@hrbmu.edu.cn](mailto:jianghuijie@hrbmu.edu.cn)

Song Wang, PHD. Department of Radiology, Longhua Hospital, Shanghai University of Traditional Chinese Medicine, No.725, South Wanping Road, Shanghai, 200032, China.

E-mail: [songwangws@163.com](mailto:songwangws@163.com)

**Supplement Figures**

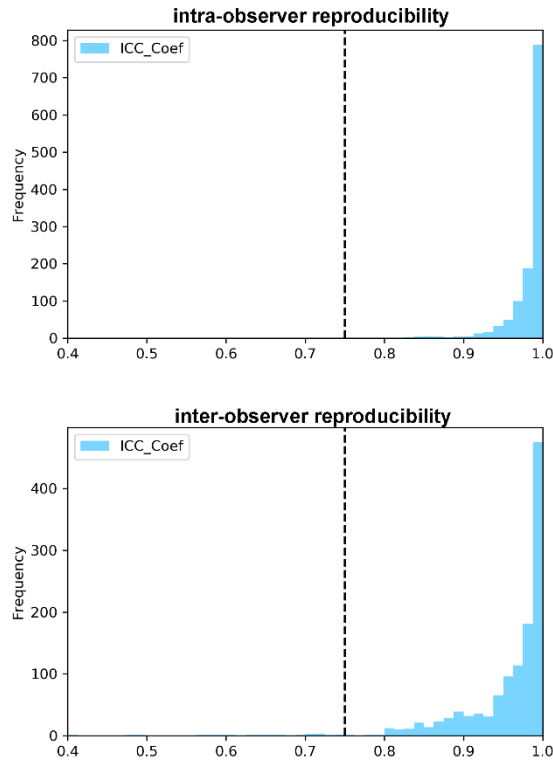

**Figure S1.** The bars of intra- and inter-observer's ICC. A coefficient greater than 0.75 is considered to have a good consistency. 28 coefficients were less than 0.75, that is, the parts to the left side of the dotted line in the bottom panel. ICC\_Coef: intra-class correlation coefficient.

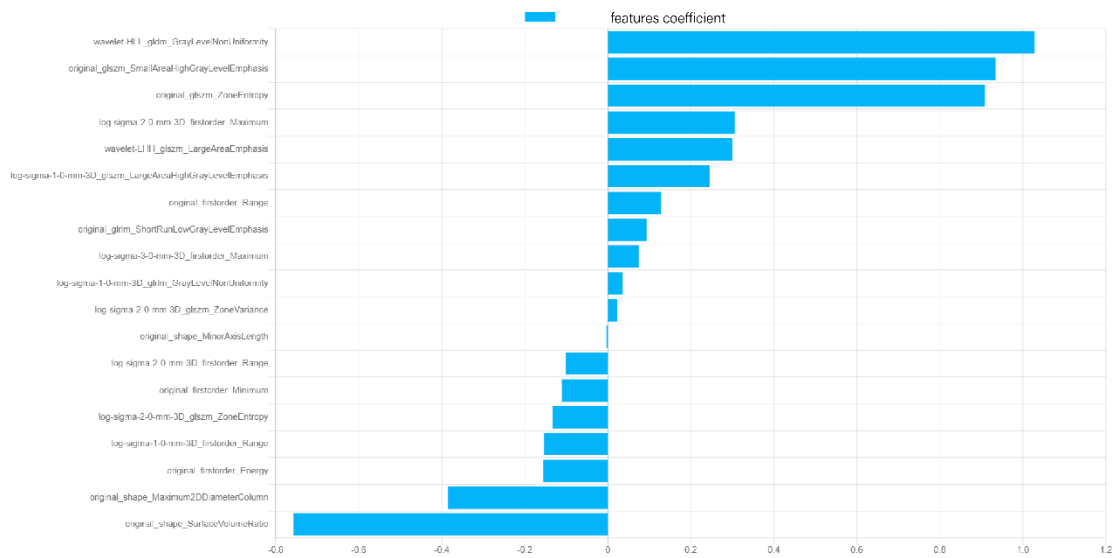

**Figure S2.** The bar diagram of the selected features with different relative weights in the logistic regression model. The features' coefficient less than 0 is a negative correlation, on the contrary, it is a positive correlation. The larger the absolute value of the feature coefficient is, the higher the relative weight in the model.

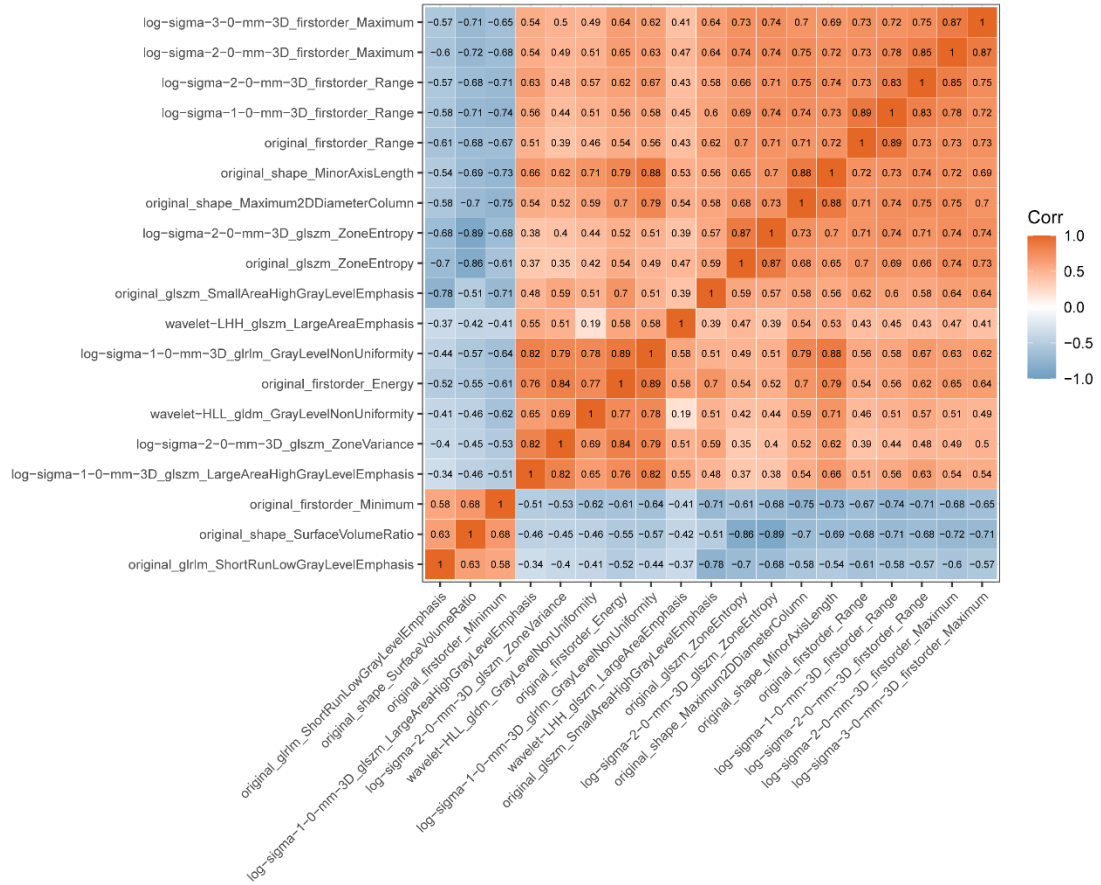

**Figure S3.** Correlation heat map of the selected 19 features. All the features' correlation coefficients are less than 0.9.

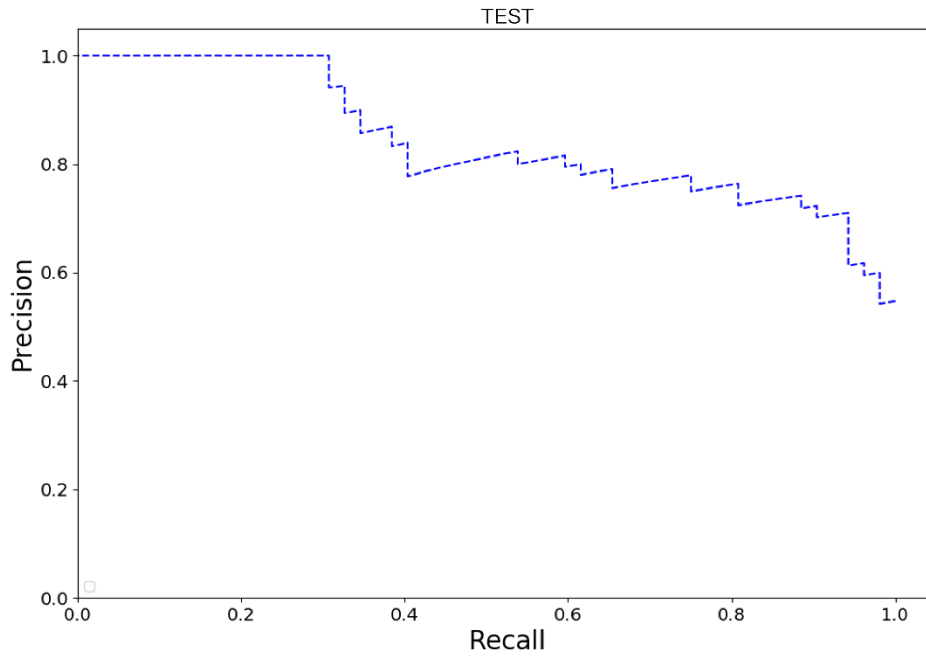

**Figure S4.** The precision-recall graph of LR radiomics model in the test set.

## Supplement Tables

**Table S1.** Demographic and laboratory characteristics of patients with COVID-19 in the training and test cohort.

|                                       | Training set (N=124) |                     |         | Test set (N=64)   |                   |         |
|---------------------------------------|----------------------|---------------------|---------|-------------------|-------------------|---------|
|                                       | Improvement(n=70)    | Aggravation(n=54)   | P-value | Improvement(n=41) | Aggravation(n=23) | P-value |
| <b>Age</b>                            | 55.0<br>[49.2;65.8]  | 60.5<br>[56.0;67.0] | 0.030   | 52.72 (5.64)      | 57.89 (10.01)     | 0.063   |
| <b>Sex</b>                            |                      |                     | 0.227   |                   |                   | 0.251   |
| Male                                  | 34 (48.6%)           | 33 (61.1%)          |         | 7 (38.9)          | 12 (63.2)         |         |
| Female                                | 36 (51.4%)           | 21 (38.9%)          |         | 11 (61.1)         | 7 (36.8)          |         |
| <b>Temperature, °C</b>                | 37.5<br>[36.9;38.2]  | 37.8<br>[37.0;38.2] | 0.488   | 37.34 (0.73)      | 37.59 (0.71)      | 0.307   |
| <b>Length of hospitalized</b>         | 21.6 (7.70)          | 23.1 (9.65)         | 0.352   | 16.78 (5.12)      | 18.89 (6.17)      | 0.265   |
| <b>Symptom to discharged interval</b> | 25.0<br>[22.0;31.8]  | 32.0<br>[27.0;38.0] | 0.001   | 22.94 (4.90)      | 29.26 (4.90)      | <0.001  |
| <b>Complication</b>                   |                      |                     |         |                   |                   |         |
| Angiocardopathy                       | 16 (22.9%)           | 17 (31.5%)          | 0.383   | 7 (17.1%)         | 9 (39.1%)         | 0.098   |
| diabetes                              | 14 (20.0%)           | 12 (22.2%)          | 0.937   | 3 (7.32%)         | 5 (21.7%)         | 0.124   |
| hypertension                          | 17 (24.3%)           | 19 (35.2%)          | 0.260   | 5 (12.2%)         | 8 (34.8%)         | 0.050   |
| COPD                                  | 8 (11.4%)            | 10 (18.5%)          | 0.393   | 4 (9.76%)         | 5 (21.7%)         | 0.263   |
| chronic liver disease                 | 7 (10.0%)            | 3 (5.56%)           | 0.511   | 3 (7.32%)         | 4 (17.4%)         | 0.240   |
| chronic kidney disease                | 3 (4.29%)            | 5 (9.26%)           | 0.293   | 4 (9.76%)         | 3 (13.0%)         | 0.695   |
| <b>Symptom</b>                        |                      |                     |         |                   |                   |         |
| fever                                 | 55 (78.6%)           | 47 (87.0%)          | 0.324   | 26 (63.4%)        | 16 (69.6%)        | 0.824   |
| cough                                 | 41 (58.6%)           | 37 (69.8%)          | 0.275   | 9 (22.0%)         | 12 (52.2%)        | 0.028   |

|                                       |                     |                     |            |                     |                     |            |
|---------------------------------------|---------------------|---------------------|------------|---------------------|---------------------|------------|
| muscular soreness                     | 14 (20.0%)          | 17 (31.5%)          | 0.21<br>0  | 3 (7.32%)           | 5 (21.7%)           | 0.12<br>4  |
| headache                              | 5 (7.14%)           | 11 (20.8%)          | 0.05<br>1  | 3 (7.32%)           | 5 (21.7%)           | 0.12<br>4  |
| diarrhea                              | 10 (14.3%)          | 5 (9.26%)           | 0.56<br>6  | 3 (7.32%)           | 2 (8.70%)           | 1.00<br>0  |
| <b>Laboratory</b>                     |                     |                     |            |                     |                     |            |
| white blood cell, *10 <sup>9</sup> /L | 4.78<br>[3.99;6.05] | 6.06<br>[4.83;7.29] | 0.00<br>3  | 5.33 (1.39)         | 5.94 (1.18)         | 0.06<br>8  |
| Neutrophil, *10 <sup>9</sup> /L       | 3.07<br>[2.41;3.67] | 4.15<br>[2.69;6.78] | 0.00<br>1  | 3.51<br>[3.09;4.19] | 4.51<br>[3.20;5.44] | 0.05<br>8  |
| Lymphocyte, *10 <sup>9</sup> /L       | 1.21<br>[0.89;1.55] | 0.86<br>[0.54;1.27] | 0.00<br>1  | 1.31<br>[1.04;1.52] | 0.98<br>[0.52;1.38] | 0.01<br>4  |
| Hemoglobin, g/L                       | 113 (23.8)          | 101 (16.2)          | 0.00<br>2  | 110 [95.0;127]      | 102 [96.5;113]      | 0.31<br>6  |
| D-dimer, mg/L                         | 1.06<br>[0.66;1.93] | 4.54<br>[2.11;10.1] | <0.0<br>01 | 1.52<br>[1.01;6.84] | 5.21<br>[2.78;7.46] | 0.00<br>6  |
| C-reactive protein, ml/L              | 12.2<br>[8.52;26.0] | 44.1<br>[11.8;70.8] | <0.0<br>01 | 17.2<br>[8.46;19.6] | 35.5<br>[15.7;56.1] | 0.00<br>1  |
| albumin, g/L                          | 38.0<br>[34.3;41.8] | 36.9<br>[33.9;40.8] | 0.52<br>3  | 36.1<br>[34.0;38.9] | 38.1<br>[34.0;41.2] | 0.28<br>4  |
| LDH, U/L                              | 377 [294;442]       | 540 [446;708]       | <0.0<br>01 | 357 (84.2)          | 486 (126)           | <0.0<br>01 |

Data are expressed as mean [standard deviation], median [IQR], or n (%), where n is the total number of patients in each group. *p* values are from independent sample t-test or Mann-Whitney U test (continuous variable), or Chi-square test, or Fisher's exact test (categorical variable). *P* < 0.05 indicates that it is statistically significant. LDH: lactate dehydrogenase. IQR: interquartile range.

Logistic regression is a widely used interpretable algorithm and works well if a single decision boundary exists, with stable and satisfying performance in radiomic analysis. Of the selected features, *gldm* and *glszm* belong to texture feature, and *glszm* feature accounts for the largest proportion, which can quantify the gray level zones that are defined as the number of connected voxels that share the same gray level intensity in an image. Large Area Emphasis (LAE) of the *glszm* feature, which constitutes the largest proportion of the model, is a measure of the distribution of large area size zones, with a greater value indicative of larger size zones and more coarse textures. The first-order energy feature is a volume element representing the smallest unit of three-dimensional space division.

**Table S2.** Details of the 19 selected radiomics characteristics of the Logistic Regression (LR) model.

| Feature | coefficient | relative_weight |
|---------|-------------|-----------------|
|---------|-------------|-----------------|

|                                                          |         |         |
|----------------------------------------------------------|---------|---------|
| wavelet-HLL_gldm_GrayLevelNonUniformity                  | 1.0273  | 1       |
| original_glszm_SmallAreaHighGrayLevelEmphasis            | 0.9339  | 0.9091  |
| original_glszm_ZoneEntropy                               | 0.9079  | 0.8838  |
| log-sigma-2-0-mm-3D_firstorder_Maximum                   | 0.3057  | 0.2976  |
| wavelet-LHH_glszm_LargeAreaEmphasis                      | 0.3002  | 0.2922  |
| log-sigma-1-0-mm-3D_glszm_LargeAreaHighGrayLevelEmphasis | 0.2451  | 0.2385  |
| original_firstorder_Range                                | 0.128   | 0.1246  |
| original_glrmlm_ShortRunLowGrayLevelEmphasis             | 0.0935  | 0.0911  |
| log-sigma-3-0-mm-3D_firstorder_Maximum                   | 0.0741  | 0.0721  |
| log-sigma-1-0-mm-3D_glrmlm_GrayLevelNonUniformity        | 0.0358  | 0.0349  |
| log-sigma-2-0-mm-3D_glszm_ZoneVariance                   | 0.0226  | 0.022   |
| original_shape_MinorAxisLength                           | -0.0036 | -0.0035 |
| log-sigma-2-0-mm-3D_firstorder_Range                     | -0.1011 | -0.0984 |
| original_firstorder_Minimum                              | -0.1103 | -0.1074 |
| log-sigma-2-0-mm-3D_glszm_ZoneEntropy                    | -0.1325 | -0.129  |
| log-sigma-1-0-mm-3D_firstorder_Range                     | -0.1536 | -0.1495 |
| original_firstorder_Energy                               | -0.1549 | -0.1507 |
| original_shape_Maximum2DDiameterColumn                   | -0.3849 | -0.3747 |
| original_shape_SurfaceVolumeRatio                        | -0.7565 | -0.7364 |

Feature values are named in three levels: first-level names indicate whether the filter is used, original indicates that the filter is not used; log: Laplacian of Gaussian; wavelet represents the wavelet transform. The second level is divided into three categories: first-order, shape, texture (glszm, gldm). The third level is the name of the specific features.

**Table S3.** Delong's test among the three kinds of models.

| Model 1         | Model 2        | P-value |
|-----------------|----------------|---------|
| Radiomics model | Clinical model | 0.698   |
| Radiomics model | Combined model | 0.714   |
| Clinical model  | Combined model | 0.103   |

**Table S4.** Delong's test within the different models in the training set.

| Model1.ROC             | Model2.ROC                | P-value |
|------------------------|---------------------------|---------|
| Logistic Regression    | Support Vector Machine    | 0.007   |
| Logistic Regression    | Decision Tree             | 0.015   |
| Logistic Regression    | Random Forest             | 0.779   |
| Logistic Regression    | Extreme Gradient Boosting | 0.095   |
| Support Vector Machine | Decision Tree             | 0.633   |
| Support Vector Machine | Random Forest             | 0.020   |
| Support Vector Machine | Extreme Gradient Boosting | 0.472   |

|               |                           |       |
|---------------|---------------------------|-------|
| Decision Tree | Random Forest             | 0.012 |
| Decision Tree | Extreme Gradient Boosting | 0.182 |
| Random Forest | Extreme Gradient Boosting | 0.037 |
